# Supplementary material
Source: Springer Nature journal article supplement (https://www.springermedizin.de/resource/supplementary/13063_2010_676_MOESM3_ESM.pdf/9618462)

# How to cool (2) for pilot feasibility and safety study of a simple, low cost method of whole body cooling in neonatal encephalopathy in the Special Care Baby Unit, Mulago Hospital, Kampala

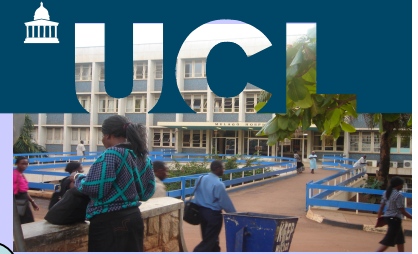

If the baby's admission rectal temperature is  $< 34\text{ }^{\circ}\text{C}$

If rectal temp. is  $< 33.0\text{ }^{\circ}\text{C}$ : add one sheet on baby and check temp. after 30', do not start cooling with water bottles

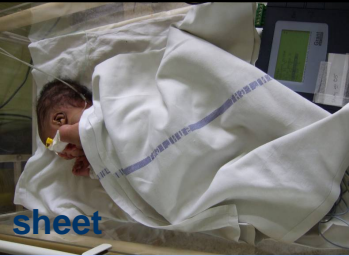

If temp. is between  $33.0\text{--}34\text{ }^{\circ}\text{C}$  and the baby is naked: don't start water bottles yet but check temp. in 30' again

If the rectal temp. stays  $< 33.0\text{ }^{\circ}\text{C}$ , add one blanket on baby and check temp. again after 30'

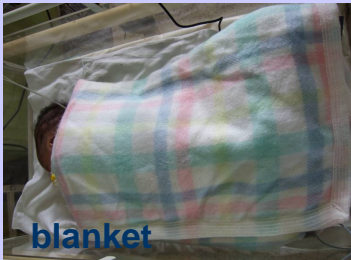

If the baby's rectal temp. stays  $< 33.0\text{ }^{\circ}\text{C}$  add a second blanket and check rectal temp. again after 30'

Only once the baby's temp. has reached  $> 34\text{ }^{\circ}\text{C}$  when **baby is naked** with nappy only start cooling with water bottles

If rectal temp. is now  $> 34$ , start cooling with water bottles and check temp. again after 30'

If baby's rectal temp. is stable between  $33.0\text{--}34.0$  monitor temp. as in daily log and do not start cooling with water bottles yet

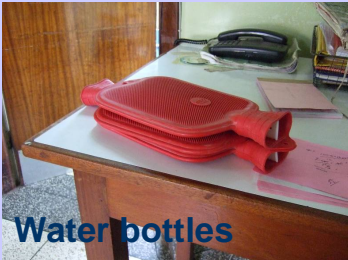

Supplement: MOESM3 [file 9618462]
